# Supplementary material for: 2018 American Neuropsychiatric Association Annual Meeting Abstracts
Source: Atypon-hosted journal article supplement (doi:10.1176/appi.neuropsych.17100225), 2018-07-01
Supplement: appi.neuropsych.17100225.ds001.pdf [file appi.neuropsych.17100225.ds001.pdf]

# ABSTRACTS

## Presented at the 29<sup>th</sup> Annual Meeting of the American Neuropsychiatric Association

March 21–24, 2018  
The Westin Copley Place

**BOSTON**  
MASSACHUSETTS - USA

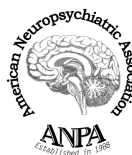

### ANPA Executive Committee

#### President

John J. Campbell, MD, FANPA

#### Immediate Past President

Jeremy D. Schmahmann, MD, FANPA

#### President Elect

Robin Hurley, MD, FANPA

#### Treasurer

C. Edward Coffey, MD, FANPA

### ANPA Scientific Program Committee Members and Reviewers

**Chair:** Kaloyan Tanev, MD, FANPA

Kevin Black, MD, FANPA

Joan Camprodou, MD, PhD

Omar Ghaffar, MD, MSc, FRCPC, FANPA

Robin Hurley, MD, FANPA

Daniel Kaufer, MD, FANPA

Richard Ronan Murphy, MD

Jeremiah Scharf, MD, PhD

Katherine Taber, PhD, FANPA

## Awards Presented at the 2018 Annual Meeting

### **Gary J. Tucker, MD Lifetime Achievement Award in Neuropsychiatry**

Established in his memory, the Gary J. Tucker, MD Award in Neuropsychiatry is the highest honor bestowed by ANPA and is presented to an individual who has demonstrated sustained commitment and service to ANPA and whose career has best exemplified the professional and personal values of Dr. Tucker. These values include academic leadership in Neuropsychiatry, commitment, mentoring, and scholarship. Recipients shall have demonstrated such values through a lifetime commitment to improving our understanding of brain-behavior relationships as they affect mental illness.

**The 2018 awardee is Sheldon Benjamin, MD.**

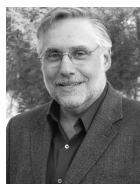

### **Fellow of the American Neuropsychiatric Association**

The designation of Fellow of the American Neuropsychiatric Association recognizes significant contributions to the field of neuropsychiatry, behavioral neurology, neuropsychology or the clinical neurosciences and to the Association.

**The individual named a fellow of ANPA in 2018 is Barbara Schildkrout, MD.**

### **The Sidney R. Baer Jr. Career Development Award**

The Sidney R. Baer Jr. Career Development Award Program recognizes an advanced trainee in neuropsychiatry, behavioral neurology or neuropsychology whose accomplishments during training offer promise of a successful career in neuropsychiatry and the clinical neurosciences. **The 2018 awardee is Maiya R. Geddes, MD, FRCPC.**

### **ANPA Young Investigator Awards**

The ANPA Young Investigator Award recognizes early trainees who are embarking on promising careers in the clinical neurosciences. The recipients are chosen from the submitted presentations at the Annual Meeting. The decisions are based on the quality of the abstract submission and, more broadly, the candidate's perceived ability to make a contribution to the field with the encouragement and support provided by the award. **The 2018 awardees are Eric Luria Goldwaser, PhD and Shan H. Siddiqi, MD.**

### **ANPA Clinical Neuroscience Trainee Award**

ANPA Clinical Neuroscience Trainee Award recognizes an outstanding trainee with special accomplishments or involvement in the clinical neurosciences. This award was designed to facilitate early involvement in ANPA by highly motivated residents in psychiatry or neurology, considering careers in neuropsychiatry or behavioral neurology, or doctoral candidates considering careers in neuropsychology. **The 2018 awardee is Robert A. Weir, MD.**

## ABSTRACTS

Full text of the abstracts presented at the Meeting accompanies the online edition of the Summer 2018 issue, at <http://neuro.psychiatryonline.org>. The abstracts can be cited in the following format:

Author name(s); Title of abstract, in Abstracts Presented at the 29th Annual Meeting of the American Neuropsychiatric Association. *J Neuropsychiatry Clin Neurosci* 2018; 30(3):e1–e37

- P1. Suicidality in Veterans With Mild TBI Does Not Correlate With PTSD or Depressive Symptoms** *Alexandra Aaronson, Theresa Pape, Amy Herrold*
- P2. A Catatonic Surprise** *Nicole Abbot, Cameron Koester, Kathleen Bottum*
- P3. Psychotherapy in the Treatment of PTSD: A Meta-Regression and Meta-Analytic Comparison of Cognitive Behavioral Therapy (CBT) and Eye Movement Desensitization and Reprocessing (EDMR)** *Saeed Ahmed, Ali Khan, Mariya Hussain, Vijaya Padma Kotapati*
- P4. Current Neurobiological Perspectives on Psychosis and Epilepsy—Case Report and Review of the Literature** *Sherese Ali*
- P5. An Emotional Word Paradigm Elicits Neural Circuit Abnormalities Across Multiple Functional Domains in PTSD** *Samir Awasthi, Hong Pan, Marylene Cloitre, David Silbersweig, Emily Stern*
- P6. The Neuropsychiatric Inventory—Questionnaire (NPI-Q) in Clinical Practice: A Retrospective Review** *James R. Bateman, Lydia S. Hatfield, Lauren Morris, K. Amy Stepp, Daniel I. Kaufer*
- P7. Volumetric Analysis of Mild Traumatic Brain Injury Using NeuroQuant<sup>®</sup>** *James R. Bateman, David Rubinstein, Christopher M. Filley*
- P8. Development and Implementation of a Point-of-Care Registry for Patients with a History of Acquired Brain Injuries** *Emily Berich, Margo Lauterbach, Alexander Maclay, Andrew Ready, Robert Schloesser, Vassilis Koliatsos*
- P9. Provisional Tic Disorder Remits Only Rarely** *Kevin J. Black, Deanna J. Greene, Emily C. Bihun, Jonathan M. Koller, Jacqueline M. Hampton, Matthew de la Paz, Bradley L. Schlaggar*
- P10. Hypomania versus Post-Traumatic Stress Disorder in Returning War Veterans: Is the Fog of War Clouding the Issue?** *Douglas V. Brennan, Kaloyan Tanev*
- P11. Neurostimulation for Functional Weakness: A Longitudinal Evaluation of Cortical Neurophysiology** *Matthew J. Burke, Reina Isayama, Gaayathiri Jegatheeswaran, Carolyn Gunraj, Anthony Feinstein, Anthony E. Lang, Robert Chen*
- P12. The Haircut Sign in Alzheimer's Disease: A Case Series of Misidentification Delusions** *Stephanie Buss, Ryan Darby*
- P13. Posterior Variant of the Alien Hand Syndrome: A Case Report** *Arindam Chakrabarty, Jeffrey I. Bennett*
- P14. Semantic Processing of Emotional Words in Schizophrenia** *Sara Dar, Einat Liebenthal, Hong Pan, David Silbersweig, Emily Stern*
- P15. Network Localization of Disordered Free Will Perception** *R. Ryan Darby, Matthew Burke, Michael D. Fox*
- P16. Speech and Motor Mimicry: A Case Report of Echophenomena in Frontotemporal Dementia** *Ashima Datey, Arindam Chakrabarty, Jeffrey I. Bennett*
- P17. Neurobiological Correlates of Soft Neurological Signs in Neuroleptic-Naïve First Episode Psychosis** *Kiranpreet Dhaliwal, Paulo Lizano, Olivia Lutz, Debra Montrose, Matcheri Keshavan*
- P18. Catatonia in a Child With Down Syndrome** *Lindsay Diemer, Cassie Karlsson, Jill Fodstad*
- P19. Electroconvulsive Therapy Induced Phantogeusia and Palinageusia** *Sulekho Egal, Alan Hirsch*
- P20. Elimination of Gustatory Hallucination With Lycopersicon Extract (Mott's Tomato Juice)** *Sulekho Egal, M.A. Yaya, A.R. Hirsch*
- P21. The Habenula's Role in Adaptive Behaviors: Contributions from Neuroimaging** *Erica L. Epstein, Robin A. Hurley, Katherine H. Taber*
- P22. Neurocognitive Improvements with Completion of Cognitive-Behavioral Therapy for PTSD in Post-9/11 Veterans** *Lydia E. Federico, Lauren M. Laifer, Yang Chen, Scott P. Orr, Roger K. Pitman, Kaloyan S. Tanev*
- P23. Misdiagnosed Temporal-Occipital Stroke, Neuropsychiatric Symptoms, and Brain Plasticity** *Lydia E. Federico, Valerie Sydnor, Catherine L. Leveroni, Otto Rapalino, Kaloyan S. Tanev*
- P24. Markers of Novelty Processing in Older Adults are Stable and Reliable** *Nicole C. Feng, Eliza Ryan, Erich S. Tusch, Phillip J. Holcomb, Krister Håkansson, Abdul Mohammed, Kirk R. Daffner*
- P25. Panic Attack as the Sole Manifestation of Epilepsy Localized to the Non-Dominant Temporal Region** *James Fraser-Rini, Dean Naritoku*
- P26. Acute Neuropsychiatric Manifestations of a Bilateral Caudate Infarction** *James Fraser-Rini, Dean Naritoku*
- P27. Mapping Musical Automatism: Further Insights From Epileptic High-Frequency Oscillations Analysis** *James Fraser-Rini, Juan Ochoa*
- P28. Dissociation Between Incidental and Intentional Motivational Processes in Healthy Aging** *Maiya R. Geddes, John Gabrieli*
- P29. Cognitive Sequelae of Primary Angiitis of the Central Nervous System Vasculitis (PACNS)—A Case Study** *Mary Reeni M. George, Lisa Nassif, Eyal Muscal*
- P30. Trait Resilience Linked to Personality Dimensions and Affective Symptoms in Motor Functional Neurological Disorders** *Sean Glass, Rozita Jalilianhasanpour, Isabelle Gilman, Benjamin Williams, Matthew J. Burke, Gregory L. Fricchione, Matcheri S. Keshavan, W. Curt LaFrance, Jr., David L. Perez*

- P31. Segregation of Anticipatory Anxiety, Aversive Stimulus Fear, and Healthy Habituation** *Martin Goldstein, Michael Silverman, Megan Lida, Amy Aloysi*
- P32. Autoantibodies Mediate Amyloid Plaque Formation in Alzheimer's Disease Secondary to Blood-Brain Barrier Damage: Implications Toward Pathogenesis, Diagnosis, and Treatment** *Eric L. Goldwaser, Nimish K. Acharya, Robert G. Nagele*
- P33. Characterization of Hallucinations in Anti-NMDA Receptor Encephalitis** *Ronald J. Gurrera*
- P34. Cognitive Impairments in Anti-NMDA Receptor Encephalitis Patients Presenting With Behavioral Disorders** *Ronald J. Gurrera*
- P35. NMS or Anti-NMDA Receptor Encephalitis? A Critical Diagnostic Distinction** *Ronald J. Gurrera*
- P36. Integrating Behavioral Modeling and Neurocircuitry to Elucidate Approach/Avoidance Behaviors** *Emily Hahn, Julia Felicione, Aishwarya Gosai, Matt Boggess, Alex Rockhill, Kristen Ellard, Todd Herrington, Shaun Patel, Angelique Paulk, Alik Widge, Emad Eskandar, Darin Dougherty, Thilo Deckersbach*
- P37. Chronic Manganese Toxicity and VGKC Complex Antibodies in Relapsing Neuropsychiatric Illness: A Case Report** *Cyrus S.H. Ho, Roger C.M. Ho, Amy M.L. Quek*
- P38. From High to Stupor: Consideration of Methamphetamine Use and Catatonia** *Veronica Hocker, Nabil Ali*
- P39. Return of the Great Imitator: 2 Cases of Neurosyphilis-Induced Psychosis** *Veronica Hocker, Peter Callejo-Black, Nabil Ali*
- P40. Atypical Presentation of Autoimmune Encephalitis in Patients With Prior Psychiatric Illness: Delayed Diagnosis Due to Premature Closure** *Abigail M. Huff, Katherine Brownlowe*
- P41. Teaching Materials to Assist in the Neuropsychiatric Investigation and Understanding of Poison Exposure Part III—Heavy Metals** *Robin A. Hurley, Katherine H. Taber*
- P42. The Cognitive and Behavioral Effects of Near-Hanging in a Pediatric Patient** *Gul Jabbar, Chanel Lee, Mariel Molina, Anupriya Razdan, Danielle Ploetz, Marco Grados*
- P43. The Effect of Mint Flavored Chewing Gum on Reaction Time** *Khurram A. Janjua, Noah H. Hirsch, Alan R. Hirsch*
- P44. The Feasibility of RELAXaHEAD (A Smartphone Based Progressive Muscle Relaxation [PMR] Therapy and Electronic Diary Application) for Use in a Headache Center** *Sarah Jinich, Thomas Berk, Sait Ashina, Richard Lipton, Scott Powers, Mia Minen*
- P45. The Union of Consult-Liaison and Neuropsychiatry: Assessment of Executive Function for Decisional Capacity at the Bedside** *Kevin Johns, David Kasick, Katherine Brownlowe*
- P46. Prevention of Recurrent Psychosis and Catatonia With Ativan in a Pregnant Patient** *Uruj Kamal, Sara Brewer, Nancy Byatt*
- P47. Acute Disseminated Encephalomyelitis Presenting With Depression and Psychotic and Catatonic Features Improved With ECT** *Uruj Kamal, Steven Fischel, Stephen Mueller, Adam Mirot*
- P48. The Role of Neuropsychiatrists in Advancing Medical Science** *Joseph M. Keating, Delia Bakeman, Aekta Malhotra, Sheldon Benjamin*
- P49. Investigating Working Memory Impairment in Mild Traumatic Brain Injury: Scoping Review of Neurophysiological Studies** *Shaji Khan, Aturan Shanmugalingam, Amer M. Burhan*
- P50. Post-Stroke Psychosis and Mania From Incidental Cryptogenic Stroke** *Cecilia Lau, Vijay Swahari, Nabil Ali, Elizabeth Sumner*
- P51. Circuit Mechanisms and Predictors of Electroconvulsive Therapy (ECT) Anti-Suicidal Properties: A Dimensional Neuropsychiatric Approach** *Erik Lee, Marta Cano-Catala, Tracy Barbour, Kristen Ellard, Michael Henry, Joan A. Camprodon*
- P52. Bifrontal Hypermetabolism on Brain FDG-PET in a Case of C9orf72-related Behavioral Variant of Frontotemporal Dementia** *Jake Levy, Christian Bocti, Dominique Elie, Nancy Paquet, Jean-Paul Soucy, Simon Ducharme*
- P53. Social Cognitive Ability Reflected in Individual Brain Network Topology** *George Ling, Ivy Lee, Synthia Guimond, Neeraj Tandon, Kathryn E. Lewandowski, Shaun Eack, Matcheri Keshavan, Roscoe Brady*
- P54. Choroid Plexus Enlargement Across Psychotic Disorders: Findings From the Bipolar Schizophrenia Network Intermediate Phenotypes (BSNIP) Study** *Paulo Lizano, Olivia Lutz, George Ling, Jaya Padmanabhan, Neeraj Tandon, Ney Alliey-Rodriguez, Brett Clementz, Godfrey Pearlson, John Sweeney, Elliot Gershon, Carol Tamminga, Matcheri Keshavan*
- P55. Non-Alcoholic Wernicke's Encephalopathy Secondary to R-CHOP Chemotherapy Presenting with Capgras Syndrome and Reduplicative Paranoia** *Nicholas Losso, Vivek Datta*
- P56. Expectation-Based Functional Symptom Therapy for the Inpatient Management of Paroxysmal Functional Dystonia** *Lindsey MacGillivray, Sarah C. Lidstone, Mateusz Zurowski, Anthony E. Lang*
- P57. Deep Brain Stimulation in Treatment-Resistant Depression: State of the Field and Future Directions** *Ahmed T. Makhlof, Mark A. Frye, Susannah J. Tye, Shirlene M. Sampson*
- P58. Clinical Correlates of Non-Convulsive Status Epilepticus in Elderly Patients With Acute Confusional State** *Francesco Manfredonia, Eleonora Saturno, Andrew Lawley, Sabrina Gasverde, Andrea E. Cavanna*
- P59. Dysautonomia and Nicotinic Ganglionic Receptor Autoantibodies in a Patient With Final Diagnosis of Huntington's Disease** *Amrita Mankani, Brian P. Gomoll*

- P60. When the Hoofbeats Do Belong to Zebras: A Case of Frontotemporal Dementia in the Setting of Multiple Sclerosis** *Seth A. Margolis, Andrea C. Sartori, Michael Friedman*
- P61. More is Less: The Human Subthalamic Nuclei Respond to Multi-tasking by Selectively Decreasing Neuronal Activity** *Odeya Marmor, Zvi Israel, Hagai Bergman, Renana Eitan*
- P62. Clock Drawing Performance Is Associated With Severity of Catatonia** *Michel Medina, Kristina Thurin, Kristen C. Jacobson, Joseph J. Cooper*
- P63. Adherence to Migraine Behavioral Treatment Recommendations: A Prospective Observational Study** *Mia T. Minen, Sarah Azarchi, Rachel Sobolev, Amanda Shallcross, Audrey Halpern, Thomas Berk, Naomi M. Simon, Scott Powers, Richard B. Lipton, Elizabeth Seng*
- P64. Telemedicine-Based, Multidisciplinary-Team, Intervention to Reduce Problematic Behaviors of Dementia Patients Residing in Skilled Nursing Facilities** *R. Murphy, E. Abner, X. Zhang, T. Bryant, K. Parsons, G. Jicha*
- P65. An Atypical Presentation of Progressive Supranuclear Palsy** *Timothy Newell, Anya Tisher*
- P66. A Review of Nitric Oxide Neurotransmission in Mood Disorders** *Kathy Niu, Mehdi Ghasemi*
- P67. Prevalence of Lifetime Psychiatric Disorders in Fronto-Temporal Dementia (FTD): A Comparative Study** *Nicolas Nunez, Shelly Yin, Jill McCarthy, Simon Ducharme*
- P68. User Design and Experience Preferences in a Novel Smartphone Application for Migraine Management: A Think Aloud Study of the RELAXaHEAD Application** *Emma Ortega, Adama Jalloh, Mia T. Minen*
- P69. Aripiprazole-Induced Pseudo-Myopia in a Case of Multiple Traumatic Brain Injuries** *Justin Otis, Jason Curry*
- P70. The Association of Visual Ratings of Atrophy From a Brain MRI Visual Rating Scale With Automated Measurements From Neuroimaging Software** *Jaya Padmanabhan, Michael J. Brickhouse, Samantha Krivensky, Scott McGinnis, Brad C. Dickerson*
- P71. High-Dose Spaced Theta-Burst Transcranial Magnetic Stimulation Has Rapid and Sustained Anti-Depressant Effects Versus Intravenous Ketamine in Treatment-Resistant Depression** *Jaspreet Pannu, Brandon S. Bentzley, Katy H. Stimpson, Dalton Duvio, Kirsten Cherian, Jessica Hawkins, Kristen H. Scherrer, Benjamin Vyssoki, Danielle DeSouza, Kristin Raj, Jennifer Keller, Alan F. Schatzberg, Keith D. Sudheimer, Nolan R. Williams*
- P72. Development of a Clinical Checklist Scale for Differential Diagnosis Between Behavioral Variant Frontotemporal Dementia and Primary Psychiatric Disorders** *Leora Pearl-Dowler, Flora Gossink, Annemieke Dols, Bradford C. Dickerson, Howard C. Chertkow, Yolande Pijnenburg, Simon Ducharme*
- P73. Neurologic Music Therapy for Management of Behavioral Symptoms of Dementia** *Justin Persson, Julia Sheffler, Samantha K. Holden*
- P74. Prosodic Accommodation in Frontotemporal Dementia** *Peter Pressman, Kuan Hua-Chen, Celine De Looze, Elliott Ross, Maria Luisa Gorno-Tempini, Robert Levenson*
- P75. Executive Functioning Impairments in Adults With Specific Learning Disorders** *Jennifer M. Purnell, Kevin Mazzola, Usha D. Persaud, Stephanie Amalfe, Benjamin Freer, Lana Tiersky*
- P76. Unilateral Anosmia: Neglect of Good for the Bad** *Rachana Purohit, Alan Hirsch*
- P77. Verbal Executive Functioning Deficits Related to Inferior Parietal Cortex Thickness in Posterior Cortical Atrophy** *Deepti Putcha, Michael Brickhouse, Bonnie Wong, Scott McGinnis, Janet C. Sherman, Brad Dickerson*
- P78. Using Lesion Network Mapping to Localize Brain Lesions Causing Dream Cessation** *Benjamin Rangel, Carolina Deifelt Streeze, Joel Bruss, Aaron D. Boes*
- P79. Pediatric Electroconvulsive Therapy in Three Cases of Anti-NMDA Receptor Encephalitis** *Ryan Rosenberger, Brenda Manoharan, Kristina Thurin, Annabel Boeke, Lucas Coppes, Michel Medina, Khalid Afzal, Joseph Cooper*
- P80. Assessment of Glial Fibrillary Acidic Protein as a Prognostic Marker for Neuropsychiatric Symptoms and Global Recovery After Traumatic Brain Injury** *Durga Roy, Matthew E. Peters, Allen Everett, Jeannie-Marie Leoutsakos, Haijuan Yan, Vani Rao, Kathleen Bechtold, Haris Sair, Tim Van Meter, Hayley Falk, Alexandra Vassila, Anna Hall, Uju Ofoche, Fresha Akbari, Ramon Diaz-Arrastia, Constantine Lyketsos, Fredrick Korley*
- P81. White Matter Integrity in Brain Regions of Sadness and Anhedonia After Traumatic Brain Injury** *Durga Roy, Matthew E. Peters, Allen Everett, Kenichi Oishi, Jeannie-Marie Leoutsakos, Haijuan Yan, Vani Rao, Kathleen Bechtold, Haris Sair, Timothy E. Van Meter, Hayley Falk, Alexandra Vassila, Anna Hall, Uju Ofoche, Fresha Akbari, Ramon Diaz-Arrastia, Constantine Lyketsos, Fredrick Korley*
- P82. Interleukins as Biomarkers of Education's Effect on Cognition** *Safa Rubay, Donald R. Royall, Raymond F. Palmer*
- P83. Non-Wilsonian Hepatolenticular Degeneration** *Elizabeth Ryznar, Michael Schrift*
- P84. Functional Coma: A Case Series and Review of the Literature** *Elizabeth Ryznar, Douglas R. Wilcox, Eric D. Gausche*
- P85. Individualized Brain Network Architecture Distinguishes TBI-Associated Depression From TBI and Major Depression** *Shan H. Siddiqi, Carl D. Hacker, David L. Brody*
- P86. Gait Slowing With Cognitive Distraction: Choice of Cognitive Task in the Evaluation of MCI and Dementia** *Cliff Singer, Elise Wojcik, Cameron Douglas*

- P87. Mania With Psychosis in a 15-Year-Old With Resected Posterior Fossa Tumor** *Katherine C. Soe, Cassie D. Karlsson, David W. Dunn*
- P88. Dyke Davidoff Masson Syndrome, Impact of Neuropsychiatric Manifestations in a Patient With Systemic Lupus Erythematosus** *José Sordia-Ramírez, Lucero Sáenz-Ibarra, Adrián Infante-Valenzuela, Iván de Jesús Hernández-Galarza, César Garza-Guerrero, Daniela Escobedo-Belloc*
- P89. The Prevalence and Clinical Correlates of Self-Injurious Behavior in Tourette Syndrome** *Megan Stafford, Andrea E. Cavanna*
- P90. Resilience in a Case of Moderate Traumatic Brain Injury** *Vanessa Stan*
- P91. Brain Derived Neurotrophic Factor and Apolipoprotein E4: Their Association With Glucose Metabolism, Beta-Amyloid and Cognitive Decline in Cognitively Unimpaired Adults** *Cynthia M. Stonnington, Sameen Sharieff, Pradeep Thiyyagura, Eric DeMarco, Yinghau Chen, Richard J. Caselli, Dona E.C. Locke, Bai Lu, Eric M. Reiman, Kewei Chen*
- P92. Neuroanatomically Diverse Brain Lesions Causing Mania are Functionally Connected to the Ventral Anterior Insular Cortex and Dorsal Anterior Amygdala in Humans** *Daniel Talmsov, Ivy Lee, Joey Hsu, Danielle Cooke, Roscoe O. Brady, Michael D. Fox*
- P93. Utility of Sub-Anesthetic Dosing of Ketamine in Augmenting Antidepressant Effects of ECT** *Kristina Thurin, Michel Medina, Joseph J. Cooper*
- P94. Relaxation Therapy as a Treatment for Tourette Syndrome** *Florence Tilling, Andrea E. Cavanna*
- P95. Relationship of Small Intestinal Bacterial Overgrowth With Alzheimer's Disease and its Neuropsychiatric Symptoms** *Simon Kang Seng Ting, Yu Tien Wang, Kaysar Mamun, Sze Yan Tay, Pei Shi Chia, Kinjal Doshi, Shahul Hameed*
- P96. Alzheimer's Disease Presenting as Delusional Misidentification Syndrome: Phantom Boarder Symptom** *Sean Trinh, Ricardo Salazar*
- P97. Association of Tau Deposition With Loneliness in Cognitively Normal Older Adults** *Federico d'Oleire Uquillas, Heidi I.L. Jacobs, Michael Properzi, Bernard Hanseeuw, Aaron P. Schultz, Keith A. Johnson, Reisa A. Sperling, Nancy J. Donovan*
- P98. A Case Report of Ciprofloxacin-Induced Psychosis With Pseudobulbar Affect** *Robert A. Weir*
- P99. Individual Differences in Corticolimbic Structural Profiles Linked to Insecure Attachment and Coping Styles in Motor Functional Neurological Disorders** *Benjamin Williams, Rozita Jalilianhasanpour, Nassim Matin, Gregory L. Fricchione, Jorge Sepulcre, Matcheri S. Keshavan, W. Curt LaFrance, Jr., Bradford C. Dickerson, David L. Perez*
- P100. High-Dose Spaced Theta-Burst Transcranial Magnetic Stimulation as a Rapid-Acting Anti-Depressant in Highly Refractory Depression** *Nolan R. Williams, Keith D. Sudheimer, Brandon S. Bentzley, Jaspreet Pannu, Katy H. Stimpson, Dalton Duvio, Kirsten Cherian, Jessica Hawkins, Kristen H. Scherrer, Benjamin Vyssoki, Danielle DeSouza, Kristin S. Raj, Jennifer Keller, Alan F. Schatzberg*
- P101. A Case of Late Emerging Sexually Inappropriate Behavior After Acquired Brain Injury** *Helena Winston, Justin Persson, Brice McConnell, Samantha Holden, Hal S. Wortzel*
- P102. Adverse Childhood Experiences and Aggregated Polygenic Risk Increase Lifetime Tic Severity in Adult Males With Tourette Syndrome** *Kelly Yang, Lisa Osiecki, Caitlin A. Gauvin, Dongmei Yu, Cornelia Illmann, Marco Bortolato, Erin C. Dunn, Carol A. Mathews, Jeremiah M. Scharf*
- P103. Alterations of Hippocampal Cerebral Blood Flow in Bipolar Disorder Subtypes: Findings From the Psychosis and Affective Research Domains and Intermediate Phenotypes (PARDIP) Study** *Victor Zeng, Paulo Lizano, Nicolas Bolo, Carol Tamminga, Brett Clementz, John Sweeney, Godfrey Pearlson, Matcheri Keshavan*
